# Supplementary material for: A versatile, compartmentalised gut-on-a-chip system for pharmacological and toxicological analyses
Source: PubMed Central journal article supplement (PMC7921645; doi:10.1038/s41598-021-84187-9), 2021-03-01
Supplement: 41598_2021_84187_MOESM1_ESM.pdf [file 41598_2021_84187_MOESM1_ESM.pdf]

# Supplementary Information

## **A versatile, compartmentalised gut-on-a-chip system for pharmacological and toxicological analyses**

Pim de Haan <sup>a,b, ‡</sup>, Milou J.C. Santbergen <sup>b,c, ‡</sup>, Meike van der Zande <sup>d</sup>, Hans Bouwmeester <sup>e</sup>,  
Michel W.F. Nielen <sup>c,d</sup> and Elisabeth Verpoorte <sup>a\*</sup>

<sup>a</sup> University of Groningen, Groningen Research Institute of Pharmacy, Pharmaceutical Analysis, P.O. Box 196, XB20, 9700 AD Groningen, The Netherlands.

<sup>b</sup> TI-COAST, Science Park 904, 1098 XH Amsterdam, The Netherlands

<sup>c</sup> Laboratory of Organic Chemistry, Wageningen University, Stippeneng 4, 6708 WE Wageningen, The Netherlands

<sup>d</sup> Wageningen Food Safety Research, Wageningen Research, P.O. Box 230, 6700 AE Wageningen, The Netherlands

<sup>e</sup> Division of Toxicology, Wageningen University, Stippeneng 4, 6708 WE Wageningen, The Netherlands

\* Corresponding author: E-mail: e.m.j.verpoorte@rug.nl

‡These authors contributed equally to this work.

## **Table of Contents**

|                           |   |
|---------------------------|---|
| Supplemental Methods..... | 3 |
| Supplemental Figures..... | 4 |

## Supplemental Methods

### Artificial digestive juices

**Table S1** Optimized composition of the artificial digestive juices, dissolved in ultrapure water (De Haan et al.<sup>1</sup>)

| Compound                                           | Saliva (mg/L) | Gastric Juice (mg/L) | Duodenal juice (mg/L) | Bile (mg/L) |
|----------------------------------------------------|---------------|----------------------|-----------------------|-------------|
| CaCl <sub>2</sub>                                  |               | 302                  | 151                   | 167.5       |
| Glucosamine HCl                                    |               | 330                  |                       |             |
| Glucose                                            |               | 650                  |                       |             |
| Glucuronic acid                                    |               | 20                   |                       |             |
| KCl                                                | 896           | 824                  | 564                   | 376         |
| KH <sub>2</sub> PO <sub>4</sub>                    |               |                      | 80                    |             |
| KSCN                                               | 200           |                      |                       |             |
| MgCl <sub>2</sub> .6H <sub>2</sub> O               |               |                      | 50                    |             |
| Na <sub>2</sub> SO <sub>4</sub>                    | 570           |                      |                       |             |
| NaCl                                               | 298           | 2752                 | 7012                  | 5259        |
| NaH <sub>2</sub> PO <sub>4</sub> .H <sub>2</sub> O | 1021          | 306                  |                       |             |
| NaHCO <sub>3</sub>                                 |               |                      | 3388                  | 5785        |
| NH <sub>4</sub> Cl                                 |               | 306                  |                       |             |
| Urea                                               | 200           | 85                   | 100                   | 250         |
| Uric acid                                          | 15            |                      |                       |             |
| HCl                                                |               | 4.16 mM              | 5.57 mM               | 6.17 mM     |
| NaOH                                               | 2.9 mM        |                      |                       |             |
| α-Amylase ( <i>Bacillus sp.</i> )                  | 145           |                      |                       |             |
| Bile (bovine)                                      |               |                      |                       | 6000        |
| Lipase (porcine pancreas)                          |               |                      | 500                   |             |
| Pancreatin (porcine pancreas)                      |               |                      | 3000                  |             |
| Pepsin (porcine gastric mucosa)                    |               | 1000                 |                       |             |

<sup>1</sup> P. de Haan, M. A. Janowska, K. Mathwig, G. A. A. van Lieshout, V. Triantis, H. Bouwmeester and E. Verpoorte, *Lab Chip*, 2019, **19**, 1599-1609

## Supplemental Figures

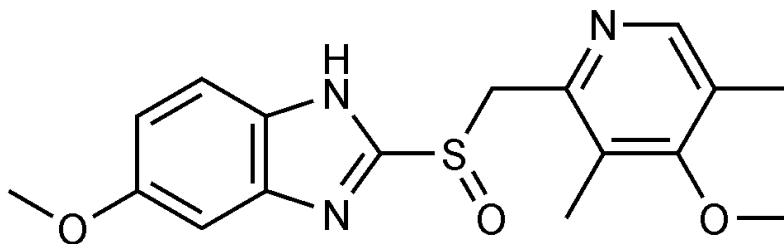

Figure S1: Molecular structure of omeprazole.

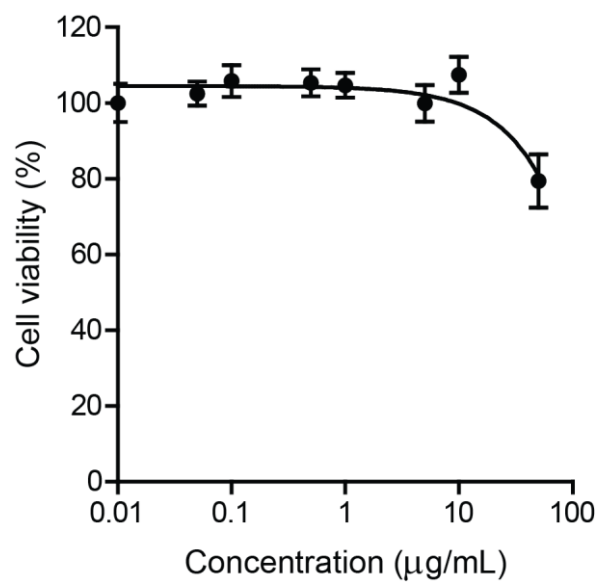

Figure S2: Cell viability of a Caco-2/HT29-MTX-E12 co-culture after 24 h exposure to increasing concentrations of omeprazole using the WST-1 mitochondrial activity assay. Viability is given as a percentage of the control ( $\% \pm \text{SEM}$ ;  $n=3$ ).

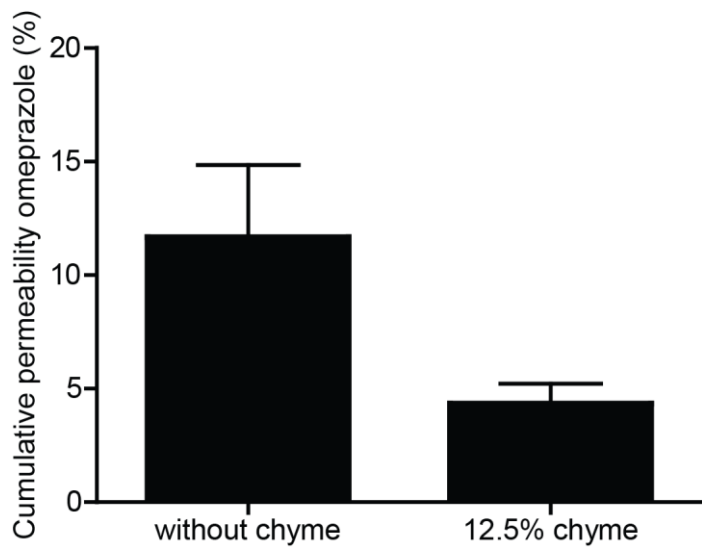

Figure S3: Permeability of omeprazole in the absence and presence of 12.5% chyme (composition as mentioned in table S1) across a monolayer of Caco-2/HT29-MTX-E12 cells in a static transwell after 30 minutes. Permeability is given as a percentage of the apical concentration ( $\% \pm \text{SEM}$ ; triplicates).

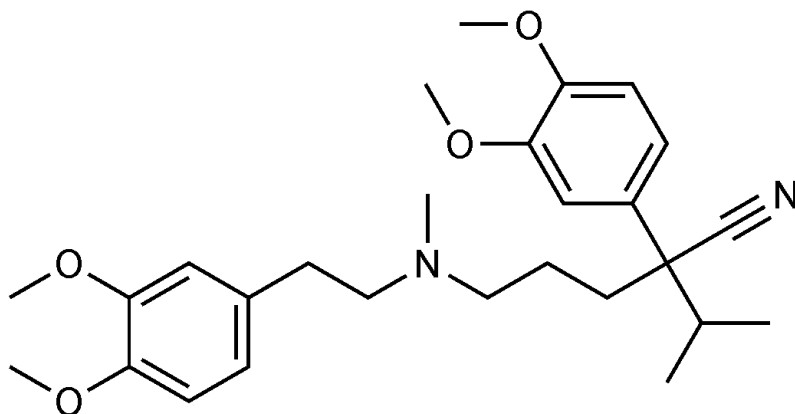

Figure S4: Molecular structure of verapamil.

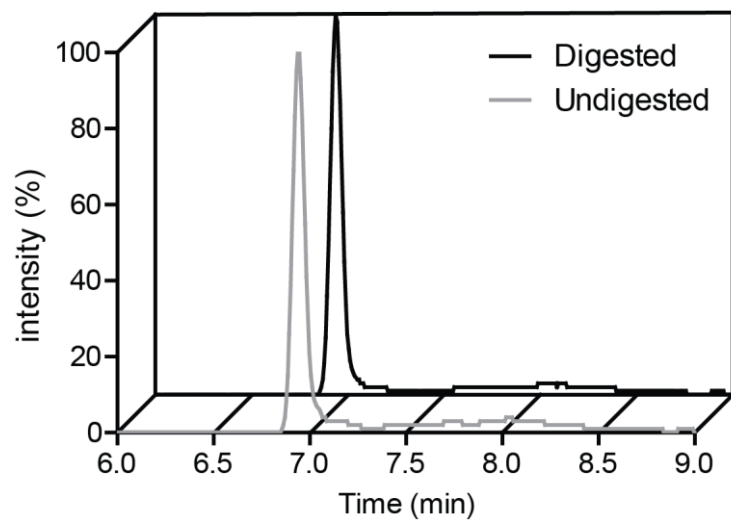

Figure S5: Reconstructed-ion chromatogram of  $m/z$  455  $[M+H]^+$  ion of verapamil after digestion (conditions as mentioned in table S1) in a test tube (black) or no digestion (grey).
